# Supplementary material for: Android Pretending to Have Similar Traits of Imagination as Humans Evokes Stronger Perceived Capacity to Feel
Source: Front Robot AI. 2019 Sep 18;6:88. doi: 10.3389/frobt.2019.00088 (PMC7805938; doi:10.3389/frobt.2019.00088)
Supplement: Supplementary file 1 [file Data_Sheet_1.xlsx]

## Sheet: raw_data
participant_ID	condition	sex	IOS	agency_communication	agency_emotion_recognition	agency_memory	agency_morality	agency_planning	agency_self_control	agency_thought	experience_consciousness	experience_desire	experience_pleasure	experience_personality	experience_pride	experience_joy	experience_embarrassment	experience_fear	experience_hunger	experience_pain	experience_rage
p1	low_follow	female	2	4	3	5	5	5	5	5	4	2	2	4	4	4	3	2	1	2	4
p2	low_follow	male	1	2	3	5	3	5	2	4	1	1	4	3	4	5	1	3	1	1	4
p3	low_follow	male	2	4	4	5	2	5	2	5	4	4	1	5	2	3	3	1	2	2	2
p4	low_follow	female	2	4	4	4	4	4	4	5	3	2	2	2	2	2	2	1	1	1	1
p5	low_follow	male	1	3	4	4	4	3	5	4	4	3	1	1	1	3	1	1	1	1	1
p6	low_follow	male	3	3	3	5	2	5	5	4	2	2	2	4	1	2	1	1	1	1	1
p7	low_follow	male	4	5	4	5	4	5	5	5	4	4	2	3	2	4	3	4	2	1	2
p8	low_follow	female	2	3	1	5	5	5	5	5	4	1	1	2	1	1	1	1	1	1	1
p9	low_follow	male	1	2	2	5	3	4	2	2	1	1	2	2	2	1	1	1	1	1	1
p10	low_follow	female	3	4	4	5	4	5	3	5	3	3	4	4	2	3	3	3	2	3	3
p11	low_follow	male	2	4	4	5	4	5	4	5	4	4	3	4	3	3	4	2	1	2	2
p12	low_follow	female	1	2	3	5	2	3	1	1	2	1	3	1	1	1	2	2	1	1	1
p13	low_follow	male	3	4	4	5	4	5	4	4	1	1	1	1	1	1	3	1	1	1	1
p14	low_follow	male	1	2	4	3	2	3	4	4	3	2	3	5	4	3	3	4	2	2	2
p15	low_lead	female	2	4	4	5	4	5	5	5	3	4	3	4	4	3	4	2	1	3	2
p16	low_lead	male	1	2	2	4	4	2	2	3	3	4	2	4	3	2	2	2	3	2	2
p17	low_lead	male	1	5	4	5	4	5	4	5	5	3	4	4	3	4	2	2	1	2	2
p18	low_lead	male	2	4	2	2	3	4	3	3	4	4	3	4	2	2	2	2	2	2	2
p19	low_lead	male	4	4	3	4	4	4	3	5	4	3	3	5	5	5	1	2	1	2	2
p20	low_lead	male	1	4	4	5	4	5	5	5	1	1	1	1	1	1	4	1	1	1	1
p21	low_lead	female	5	4	3	5	4	5	5	3	1	4	1	4	3	1	4	1	1	3	1
p22	low_lead	female	1	2	4	3	5	2	1	2	2	1	5	3	5	5	4	1	1	3	2
p23	low_lead	male	2	4	4	5	4	4	5	5	3	4	2	4	4	2	2	2	2	3	2
p24	low_lead	male	2	4	3	4	4	4	4	4	4	3	3	4	4	4	4	2	1	2	2
p25	low_lead	female	1	2	2	3	3	3	3	3	2	1	2	2	1	2	2	2	1	2	1
p26	low_lead	female	3	5	5	5	4	4	4	5	5	4	4	5	4	4	4	3	3	4	4
p27	low_lead	female	2	2	3	3	3	3	3	4	5	5	4	4	4	3	4	4	4	3	3
p28	low_lead	male	4	4	3	4	3	4	3	4	3	2	4	3	2	4	4	3	1	2	3
p29	medium_follow	female	4	4	4	5	4	4	3	5	4	3	3	4	2	3	3	3	2	3	3
p30	medium_follow	male	3	4	3	5	2	4	4	3	4	3	3	3	1	3	2	2	1	2	2
p31	medium_follow	male	6	4	4	4	3	3	3	4	4	3	4	3	3	4	2	3	3	2	2
p32	medium_follow	female	2	2	1	2	1	1	1	1	1	1	1	1	1	1	1	1	1	1	1
p33	medium_follow	male	4	5	4	5	5	2	3	5	4	4	5	3	3	4	2	2	3	2	2
p34	medium_follow	female	1	4	4	5	3	4	3	5	4	4	3	4	3	4	3	3	3	4	4
p35	medium_follow	male	6	4	4	5	4	4	3	5	4	4	4	3	3	4	4	3	4	3	3
p36	medium_follow	female	6	4	4	5	3	4	5	5	4	4	5	5	5	5	4	4	4	4	3
p37	medium_follow	male	6	4	5	5	1	5	5	5	4	2	5	4	1	3	5	2	4	2	1
p38	medium_follow	male	5	5	4	5	4	4	4	5	4	3	5	4	4	5	5	5	3	4	5
p39	medium_follow	female	6	5	4	5	3	5	4	5	5	4	5	1	2	5	3	3	1	2	4
p40	medium_follow	male	3	4	3	5	4	5	5	5	4	4	4	4	2	4	4	2	2	3	2
p41	medium_follow	male	6	4	4	5	3	4	5	4	4	1	1	4	1	2	1	1	1	1	1
p42	medium_follow	male	1	2	2	2	4	4	2	5	2	4	4	2	4	3	2	2	2	2	1
p43	medium_lead	male	5	5	4	5	4	3	3	5	5	4	4	4	3	3	3	3	4	2	3
p44	medium_lead	male	3	2	2	4	3	4	2	3	4	3	3	4	1	2	2	1	2	2	2
p45	medium_lead	male	4	2	4	4	2	3	2	3	2	1	3	4	3	2	4	2	1	2	2
p46	medium_lead	male	6	4	4	5	3	4	4	4	4	3	4	4	2	4	3	2	2	2	2
p47	medium_lead	female	6	4	3	5	5	4	4	5	4	3	4	4	3	4	4	3	3	3	2
p48	medium_lead	female	5	5	4	5	4	5	5	5	5	4	3	3	4	3	4	3	3	3	3
p49	medium_lead	female	6	4	4	5	5	4	5	4	5	4	5	3	5	5	3	2	4	2	2
p50	medium_lead	male	4	5	4	5	4	4	4	5	5	2	5	4	1	4	2	1	1	2	1
p51	medium_lead	male	6	5	3	5	4	3	4	5	4	4	4	5	4	3	3	3	4	3	3
p52	medium_lead	male	3	3	3	5	3	3	3	4	1	1	1	4	1	1	1	1	1	1	1
p53	medium_lead	female	5	4	5	5	5	5	5	5	2	2	4	4	3	4	4	3	1	3	3
p54	medium_lead	female	4	2	2	4	2	2	3	4	3	1	1	4	2	2	2	1	1	1	1
p55	medium_lead	male	5	4	5	5	3	4	3	5	3	2	4	4	3	4	2	3	2	2	4
p56	medium_lead	male	1	5	5	5	3	5	5	5	1	1	2	5	1	4	2	2	2	2	4
p57	medium_lead	female	5	4	4	5	4	4	4	4	4	2	4	4	4	4	3	3	2	3	3
p58	high_follow	male	6	4	5	4	4	5	4	5	4	5	4	4	2	5	4	3	3	3	2
p59	high_follow	male	6	5	4	5	4	3	4	5	2	2	3	2	2	2	2	2	2	2	2
p60	high_follow	male	7	4	1	5	1	4	3	3	1	1	1	4	1	1	1	1	1	1	1
p61	high_follow	female	2	2	2	4	2	4	2	3	1	2	1	2	1	1	2	2	1	2	1
p62	high_follow	male	1	3	2	4	2	4	3	1	3	2	2	2	1	2	2	2	1	2	1
p63	high_follow	male	7	5	4	5	3	4	4	2	5	4	3	2	4	4	4	2	1	2	2
p64	high_follow	male	5	4	4	5	4	5	4	4	4	4	4	3	3	4	3	2	2	2	3
p65	high_follow	female	3	5	4	5	5	5	5	5	1	2	3	4	2	3	2	3	2	2	2
p66	high_follow	female	7	5	4	5	4	5	3	5	4	2	4	3	2	4	3	2	1	2	2
p67	high_follow	female	2	5	5	5	5	5	5	5	4	1	1	4	1	5	2	1	1	1	1
p68	high_follow	male	5	5	3	5	3	4	2	4	4	3	1	3	1	2	2	1	1	2	2
p69	high_follow	male	7	5	3	5	4	5	5	5	5	2	2	1	4	3	4	2	2	2	2
p70	high_follow	female	6	3	4	5	4	5	3	2	2	3	2	1	2	2	2	2	2	2	2
p71	high_follow	male	6	5	4	5	4	5	5	5	2	4	4	3	5	4	5	2	4	3	4
p72	high_follow	female	4	2	2	5	2	3	2	3	2	2	2	4	2	2	2	1	1	2	2
p73	high_lead	female	5	5	5	5	3	2	4	5	5	5	5	2	2	5	5	5	2	4	5
p74	high_lead	male	7	5	4	5	4	5	4	5	4	3	4	4	4	3	4	2	3	2	3
p75	high_lead	male	7	3	2	4	3	3	4	4	5	3	2	3	2	2	3	2	2	3	2
p76	high_lead	male	7	4	4	5	5	3	4	5	5	3	4	5	4	3	3	4	2	3	3
p77	high_lead	male	5	5	4	5	4	4	4	5	5	4	4	3	4	4	4	4	2	2	3
p78	high_lead	female	6	4	4	5	2	5	3	5	4	2	3	5	4	4	2	3	1	2	3
p79	high_lead	female	7	3	3	3	3	3	3	5	3	3	3	3	3	3	4	3	2	2	3
p80	high_lead	male	2	4	2	5	3	4	3	4	4	3	4	4	5	4	2	1	1	3	4
p81	high_lead	female	7	4	4	4	3	5	4	4	4	3	4	2	3	4	4	3	2	3	2
p82	high_lead	female	7	5	4	5	2	4	4	5	5	2	2	5	1	2	2	2	1	2	1
p83	high_lead	male	7	5	5	5	4	5	5	5	4	4	3	4	4	4	4	4	4	3	4
p84	high_lead	male	6	4	4	5	4	4	4	4	3	3	3	4	3	3	3	3	2	1	3
p85	high_lead	female	1	1	1	5	2	5	5	5	4	1	2	4	2	1	3	1	1	2	1
p86	high_lead	male	2	4	5	5	5	5	5	5	4	2	4	3	5	4	2	2	2	2	2
p87	high_lead	male	7	4	2	5	3	4	4	5	3	2	3	4	2	3	2	2	1	2	2
p76, p79,p80 were excluded from analysis, because they suspected the use of hidden camera.

## Sheet: Descriptive Statistics
	Descriptive statistics of IOS										Multiple Comparison Descriptive statistics of IOS
	Order of Response	Degree of Congruence	Mean	Std. Deviation	N							Degree of Congruence	Mean	Std. Deviation	N
	Follow	Low	2	0.926	14							Low	2.1071	0.3147	28
		Medium	4.214	1.859	14							Medium	4.3738	0.3094	29
		High	4.933	1.982	15							High	5.2583	0.3225	27
	Lead	Low	2.214	1.264	14
		Medium	4.533	1.36	15
		High	5.583	1.977	12
	Descriptive statistics of Experience											Multiple Comparison Descriptive statistics of Experience
	Order of Response	Degree of Congruence	Mean	Std. Deviation	N							Order of Response	Mean	Std. Deviation	N
	Follow	Low	2.15	0.706	14							Follow	2.4981	0.1128	43
		Medium	2.974	0.86	14							Lead	2.8563	0.116	41
		High	2.37	0.686	15
	Lead	Low	2.761	0.703	14
		Medium	2.823	0.683	15
		High	2.985	0.602	12
	Descriptive statistics of Agency
	Order of Response	Degree of Congruence	Mean	Std. Deviation	N
	Follow	Low	3.858	0.645	14
		Medium	3.847	0.81	14
		High	3.933	0.784	15
	Lead	Low	3.734	0.743	14
		Medium	3.99	0.677	15
		High	4.143	0.47	12

## Sheet: ANOVA
		Table 4. ANOVA of IOS											Multiple Comparison IOS
			Sum Sq.	df	Mean Sq.	F	p	η2	1-β				Degree of Synchrony		lower limits (95% conf interval)	difference	higher limits (95% conf interval)	p-value	cohen's d
		A: Order of Response	3.249	1	3.2493	1.17	0.2824	0.0089	0.137624				Medium	Low	-3.3465	-2.2667	-1.1869	0	5.9138
		B: Degree of Congruence	145.705	2	72.8526	26.27	0	0.4002	1				Medium	High	-1.978	-0.8845	0.2089	0.154	2.3013
		A*B	0.703	2	0.3516	0.13	0.8811	0.0019	0.0617423				Low	High	-4.2536	-3.1512	-2.0487	0	8.1085
		Error	216.298	78	2.773
		Total	364.036	83
		df: degree of freedom, η2: effect size, 1-β: power
		Table 5. ANOVA of Experience											Multiple Comparison Experience
			Sum Sq.	df	Mean Sq.	F	p	η2	1-β				Degree of Synchrony		lower limits (95% conf interval)	difference	higher limits (95% conf interval)	p-value	cohen's d
		A: Order of Response	2.6804	1	2.68037	4.9	0.0298	0.0528	0.57036				Lead	Follow	-0.6804	-0.3583	-0.0361	0.0298	2.568
		B: Degree of Congruence	2.8	2	1.39998	2.56	0.0838	0.0552	0.479892
		A*B	2.7612	2	1.38058	2.52	0.0867	0.0544	0.473597
		Error	42.6625	78	0.54695
		Total	50.7526	83
		df: degree of freedom, η2: effect size, 1-β: power
		Table 6. ANOVA of Agency
			Sum Sq.	df	Mean Sq.	F	p	η2	1-β
		A: Order of Response	0.1219	1	0.12194	0.23	0.6334	0.0029	0.0777235
		B: Degree of Congruence	0.8022	2	0.4011	0.75	0.4737	0.0188	0.182908
		A*B	0.4341	2	0.21703	0.41	0.6663	0.0102	0.117991
		Error	41.4764	78	0.53175
		Total	42.7618	83
		df: degree of freedom, η2: effect size, 1-β: power
